# Supplementary material for: A network based covariance test for detecting multivariate eQTL in saccharomyces cerevisiae
Source: Springer Nature journal article supplement (doi:10.1186/s12918-015-0245-0), 2016-01-11
Supplement: 12918_2015_245_MOESM1_ESM.pdf [file 12918_2015_245_MOESM1_ESM.pdf]

## RESEARCH

# Supplementary materials for 'A network based covariance test for detecting multivariate eQTL in *saccharomyces cerevisiae*'

Huili Yuan<sup>1</sup>, Zhenye Li<sup>1</sup>, Nelson L. S. Tang<sup>2</sup> and Minghua Deng<sup>1,3,4\*</sup>

\*Correspondence:

dengmh@math.pku.edu.cn

<sup>1</sup>LMAM, School of Mathematical Sciences, Peking University, Yiheyuan Road, 100871 Beijing, China

Full list of author information is available at the end of the article

## 1 Supporting Information

### 1.1 Preliminary[1]

Now consider a Hilbert space  $\mathcal{F}$  of functions from  $R^p$  to  $R$ . Then  $\mathcal{F}$  is a reproducing kernel Hilbert space (RKHS) if for each  $x \in R^p$ , the Dirac evaluation operator  $\delta_x : \mathcal{F} \rightarrow R$ , which maps  $f \in \mathcal{F}$  to  $f(x) \in R$ , is a bounded linear functional. To each point  $x \in R^p$ , there corresponds an element  $\phi(x) \in \mathcal{F}$  such that  $\langle \phi(x), \phi(x') \rangle_{\mathcal{F}} = k(x, x')$ , where  $k : R^p \times R^p \rightarrow R$  is a unique positive definite kernel.

*Hilbert-Schmidt Norm.* Denote by  $C : \mathcal{G} \rightarrow \mathcal{F}$  a linear operator. Then provided the sum converges, the Hilbert-Schmidt (HS) norm of  $C$  is defined as

$$\|C\|_{HS}^2 := \sum_{i,j} \langle C\nu_i, \mu_j \rangle_{\mathcal{F}}^2 \quad (1)$$

where  $\nu_i$  and  $\mu_j$  are orthonormal bases of  $\mathcal{F}$  and  $\mathcal{G}$  respectively. It is easy to see that this generalises the Frobenius norm on matrices.

*Hilbert-Schmidt Operator.* A linear operator  $C : \mathcal{G} \rightarrow \mathcal{F}$  is called a Hilbert-Schmidt operator if its HS norm exists. The set of Hilbert-Schmidt operators  $HS(\mathcal{G}, \mathcal{F}) : \mathcal{G} \rightarrow \mathcal{F}$  is a separable Hilbert space with inner product

$$\langle C, D \rangle_{HS} := \sum_{i,j} \langle C\nu_i, \mu_j \rangle_{\mathcal{F}} \langle D\nu_i, \mu_j \rangle_{\mathcal{F}}$$

*Tensor Product.* Let  $f \in \mathcal{F}$  and  $g \in \mathcal{G}$ . Then the tensor product operator  $f \otimes g : \mathcal{G} \rightarrow \mathcal{F}$  is defined as

$$(f \otimes g)h := f\langle g, h \rangle_{\mathcal{G}} \text{ for all } h \in \mathcal{G} \quad (2)$$

Moreover, by the definition of the HS norm, we can compute the HS norm of  $f \otimes g$  via

$$\|f \otimes g\|_{HS}^2 = \langle f \otimes g, f \otimes g \rangle_{HS} = \langle f, (f \otimes g) \rangle_{\mathcal{F}} = \|f\|_{\mathcal{F}}^2 \|g\|_{\mathcal{G}}^2 \quad (3)$$

*Mean.*

$$\langle \mu_x, f \rangle_{\mathcal{F}} := E_x[\langle \phi(x), f \rangle_{\mathcal{F}}] = E_x[f(x)], \quad (4)$$

$$\langle \mu_y, g \rangle_{\mathcal{G}} := E_y[\langle \psi(y), g \rangle_{\mathcal{G}}] = E_y[g(y)], \quad (5)$$

where  $\phi$  is the feature map from  $\mathcal{X}$  to the RKHS  $\mathcal{F}$ , and  $\psi$  maps from  $\mathcal{Y}$  to  $\mathcal{G}$ . Finally,  $\|\mu_x\|_{\mathcal{F}}^2$  can be computed by applying the expectation twice via

$$\|\mu_x\|_{\mathcal{F}}^2 = E_{x,x'}[\langle \phi(x), \phi(x') \rangle_{\mathcal{F}}] = E_{x,x'}[k(x, x')] \quad (6)$$

Here the expectation is taken over independent copies  $x, x'$  taken from  $p_x$ .

*Covariance Operator.* The covariance operator associated with the joint measure  $p_x$  on  $(\mathcal{X}, \Gamma)$  is a linear operator  $\Sigma_{xx} : \mathcal{F} \rightarrow \mathcal{F}$  defined as

$$\Sigma_{xx} := E_x[(\phi(x) - \mu_x) \otimes (\phi(x) - \mu_x)] = \underbrace{E_x[\phi(x) \otimes \phi(x)]}_{:= \tilde{\Sigma}_{xx}} - \underbrace{\mu_x \otimes \mu_x}_{M_{xx}} \quad (7)$$

Similarly,  $\Sigma_{yy} : \mathcal{G} \rightarrow \mathcal{G}$  is defined as

$$\Sigma_{yy} := E_y[(\psi(y) - \mu_y) \otimes (\psi(y) - \mu_y)] = \underbrace{E_y[\psi(y) \otimes \psi(y)]}_{:= \tilde{\Sigma}_{yy}} - \underbrace{\mu_y \otimes \mu_y}_{M_{yy}} \quad (8)$$

## 1.2 Hilbert -Schmidt Different Covariance Criterion

Now, we assume that  $\mathcal{X} = \mathcal{Y}, \Gamma = \Lambda$ , so  $\phi = \psi$

**Defition(HSDCC).** Given separable RKHSs  $\mathcal{F}, \mathcal{G}$  and joint measures  $p_x, p_y$  over  $(\mathcal{X}, \Gamma)$  and  $(\mathcal{Y}, \Lambda)$ , we define the Hilbert-Schmidt Different Covariance Criterion(HSDCC) as the squared HS-norm of the difference of covariance  $\Sigma_{xx}$  and  $\Sigma_{yy}$ :

$$HSDCC(p_x, p_y, \mathcal{F}) := \|\Sigma_{xx} - \Sigma_{yy}\|_{HS}^2 \quad (9)$$

To compute it we need to express HSDCC in terms of kernel functions. This is achieved by the following lemma:

**Lemma 1 (HSDCC in terms of kernels).**

$$\begin{aligned} HSDCC(P_x, P_y, \mathcal{F}) = & E_{x,x'} k(x, x')^2 - 2E_{x'}[E_x k(x, x') E_{x''} k(x', x'')] + (E_{x,x'} k(x, x'))^2 \\ & + E_{y,y'} k(y, y')^2 - 2E_{y'}[E_y k(y, y') E_{y''} k(y', y'')] + (E_{y,y'} k(y, y'))^2 \\ & - 2E_{x,y'} k(x, y')^2 + 2E_{y'}[E_x k(x, y') E_{x'} k(x', y')] \\ & + 2E_x[E_y k(x, y) E_{y'} k(x, y')] - 2(E_{x,y'} k(x, y'))^2 \end{aligned} \quad (10)$$

Proof:

$$\begin{aligned} HSDCC(P_x, P_y, \mathcal{F}) = & \langle \Sigma_{xx} - \Sigma_{yy}, \Sigma_{x'x'} - \Sigma_{y'y'} \rangle_{HS} \\ = & \langle \Sigma_{xx}, \Sigma_{x'x'} \rangle_{HS} + \langle \Sigma_{yy}, \Sigma_{y'y'} \rangle_{HS} - \langle \Sigma_{xx}, \Sigma_{y'y'} \rangle_{HS} - \langle \Sigma_{x'x'}, \Sigma_{yy} \rangle_{HS} \end{aligned} \quad (11)$$

$$\begin{aligned}
\langle \Sigma_{xx}, \Sigma_{x'x'} \rangle_{HS} &= \langle \tilde{\Sigma}_{xx} - M_{xx}, \tilde{\Sigma}_{x'x'} - M_{x'x'} \rangle_{HS} \\
&= \langle \tilde{\Sigma}_{xx}, \tilde{\Sigma}_{x'x'} \rangle_{HS} - \langle \tilde{\Sigma}_{x'x'}, M_{xx} \rangle_{HS} - \langle \tilde{\Sigma}_{xx}, M_{x'x'} \rangle_{HS} + \langle M_{xx}, M_{x'x'} \rangle_{HS} \\
&= E_{xx'}[\langle \phi(x) \otimes \phi(x), \phi(x') \otimes \phi(x') \rangle_{HS}] - 2E_{xx'}[\langle \phi(x') \otimes \phi(x'), \mu_x \otimes \mu_x \rangle_{HS}] \\
&\quad + \langle \mu_x \otimes \mu_x, \mu_{x'} \otimes \mu_{x'} \rangle_{HS}
\end{aligned} \tag{12}$$

$$\begin{aligned}
\langle \Sigma_{yy}, \Sigma_{y'y'} \rangle_{HS} &= E_{yy'}[\langle \phi(y) \otimes \phi(y), \phi(y') \otimes \phi(y') \rangle_{HS}] - 2E_{yy'}[\langle \phi(y') \otimes \phi(y'), \mu_y \otimes \mu_y \rangle_{HS}] \\
&\quad + \langle \mu_y \otimes \mu_y, \mu_{y'} \otimes \mu_{y'} \rangle_{HS}
\end{aligned} \tag{13}$$

$$\begin{aligned}
\langle \Sigma_{x'x'}, \Sigma_{yy} \rangle_{HS} &= \langle \Sigma_{xx}, \Sigma_{y'y'} \rangle_{HS} = E_{xy'}[\langle \phi(x) \otimes \phi(x), \phi(y') \otimes \phi(y') \rangle_{HS}] - E_{y'}[\langle \phi(y') \otimes \phi(y'), \mu_x \otimes \mu_x \rangle_{HS}] \\
&\quad - E_x[\langle \phi(x) \otimes \phi(x), \mu_{y'} \otimes \mu_{y'} \rangle_{HS}] + \langle \mu_x \otimes \mu_x, \mu_{y'} \otimes \mu_{y'} \rangle_{HS}
\end{aligned} \tag{14}$$

We then give the unbiased statistics to  $HSDCC(P_x, P_y, \mathcal{F})$  like [2]

## 2 Figures

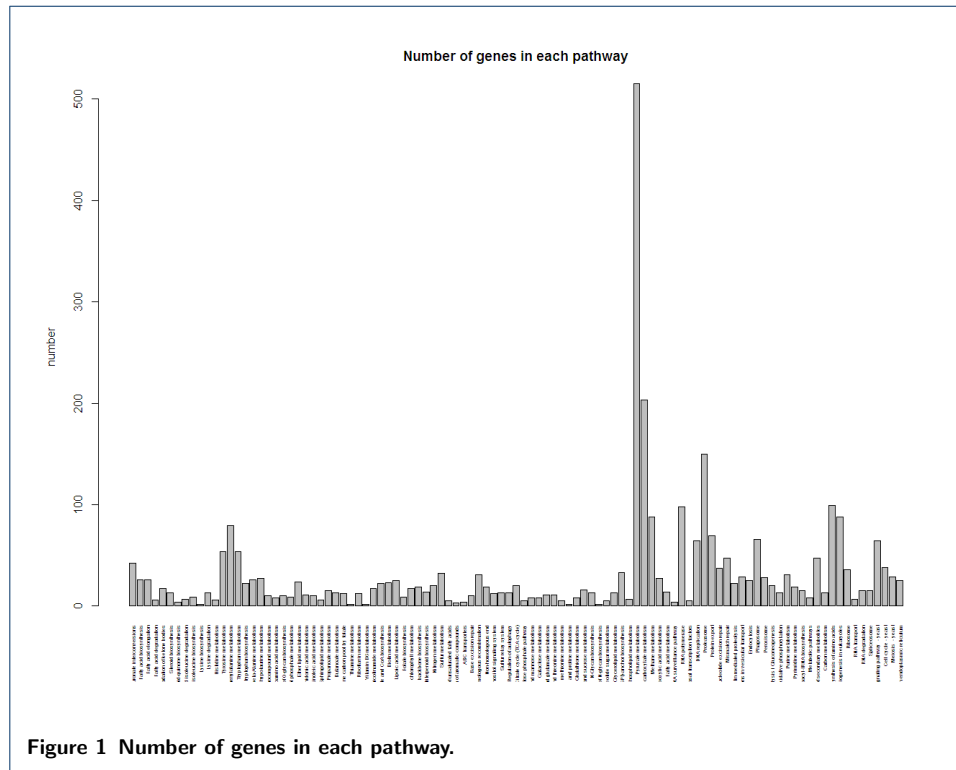

Figure 1 Number of genes in each pathway.

### Author details

<sup>1</sup>LMAM, School of Mathematical Sciences, Peking University, Yiheyuan Road, 100871 Beijing, China. <sup>2</sup>Department of Chemical Pathology, Prince of Wales Hospital, Faculty of Medicine, The Chinese University of Hong Kong, Shatin, Hong Kong, China. <sup>3</sup>Center for Quantitative Biology, Peking University, Yiheyuan Road, 100871 Beijing, China. <sup>4</sup>Center for Statistical Sciences, Peking University, Yiheyuan Road, 100871 Beijing, China.

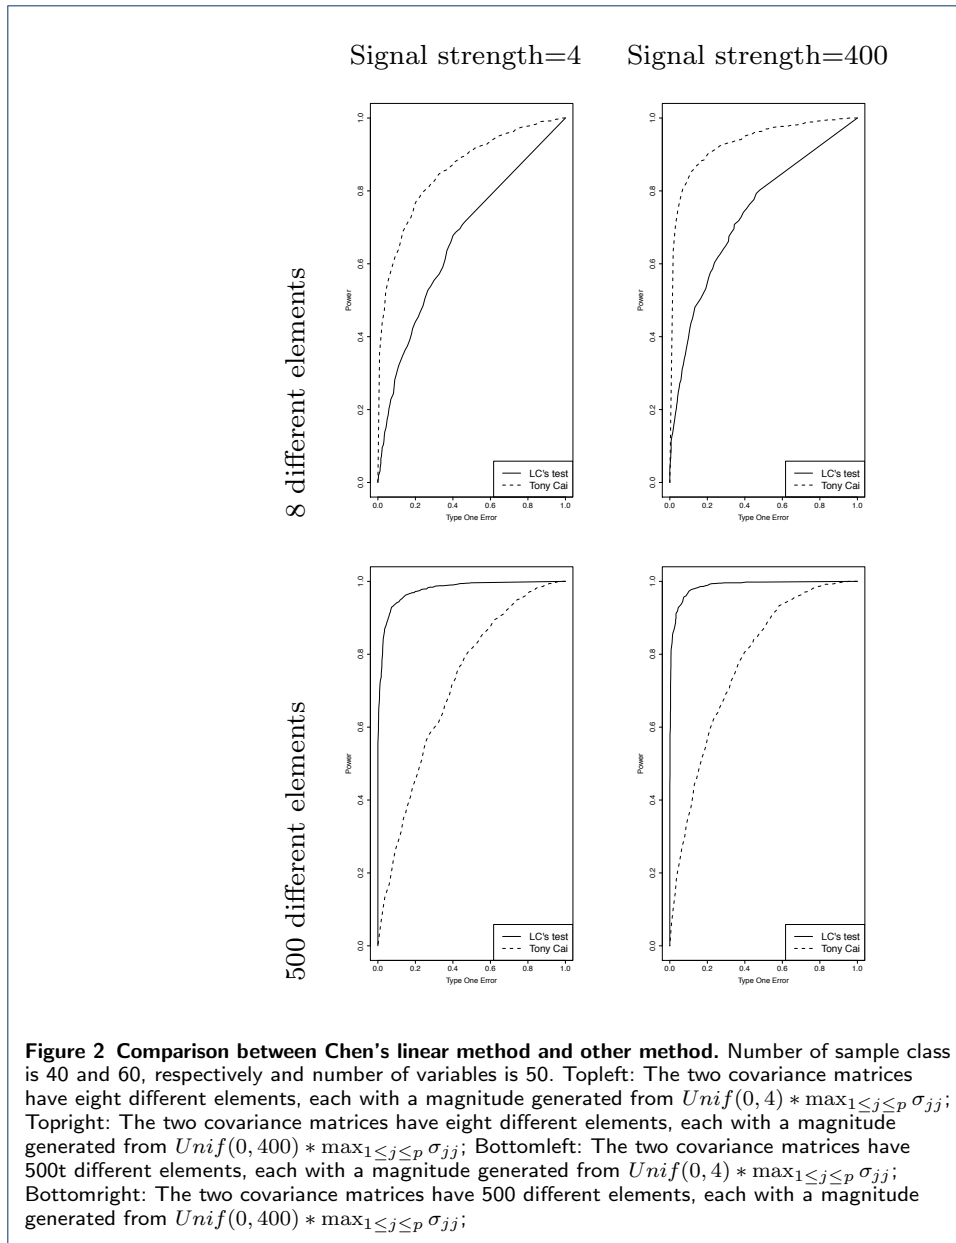

**References**

1. Arthur Gretton, Olivier Bousquet, Alex Smola, and Bernhard Schölkopf. Measuring statistical dependence with hilbert-schmidt norms. In *Algorithmic learning theory*, pages 63–77. Springer, 2005.
2. Jun Li, Song Xi Chen, et al. Two sample tests for high-dimensional covariance matrices. *The Annals of Statistics*, 40(2):908–940, 2012.

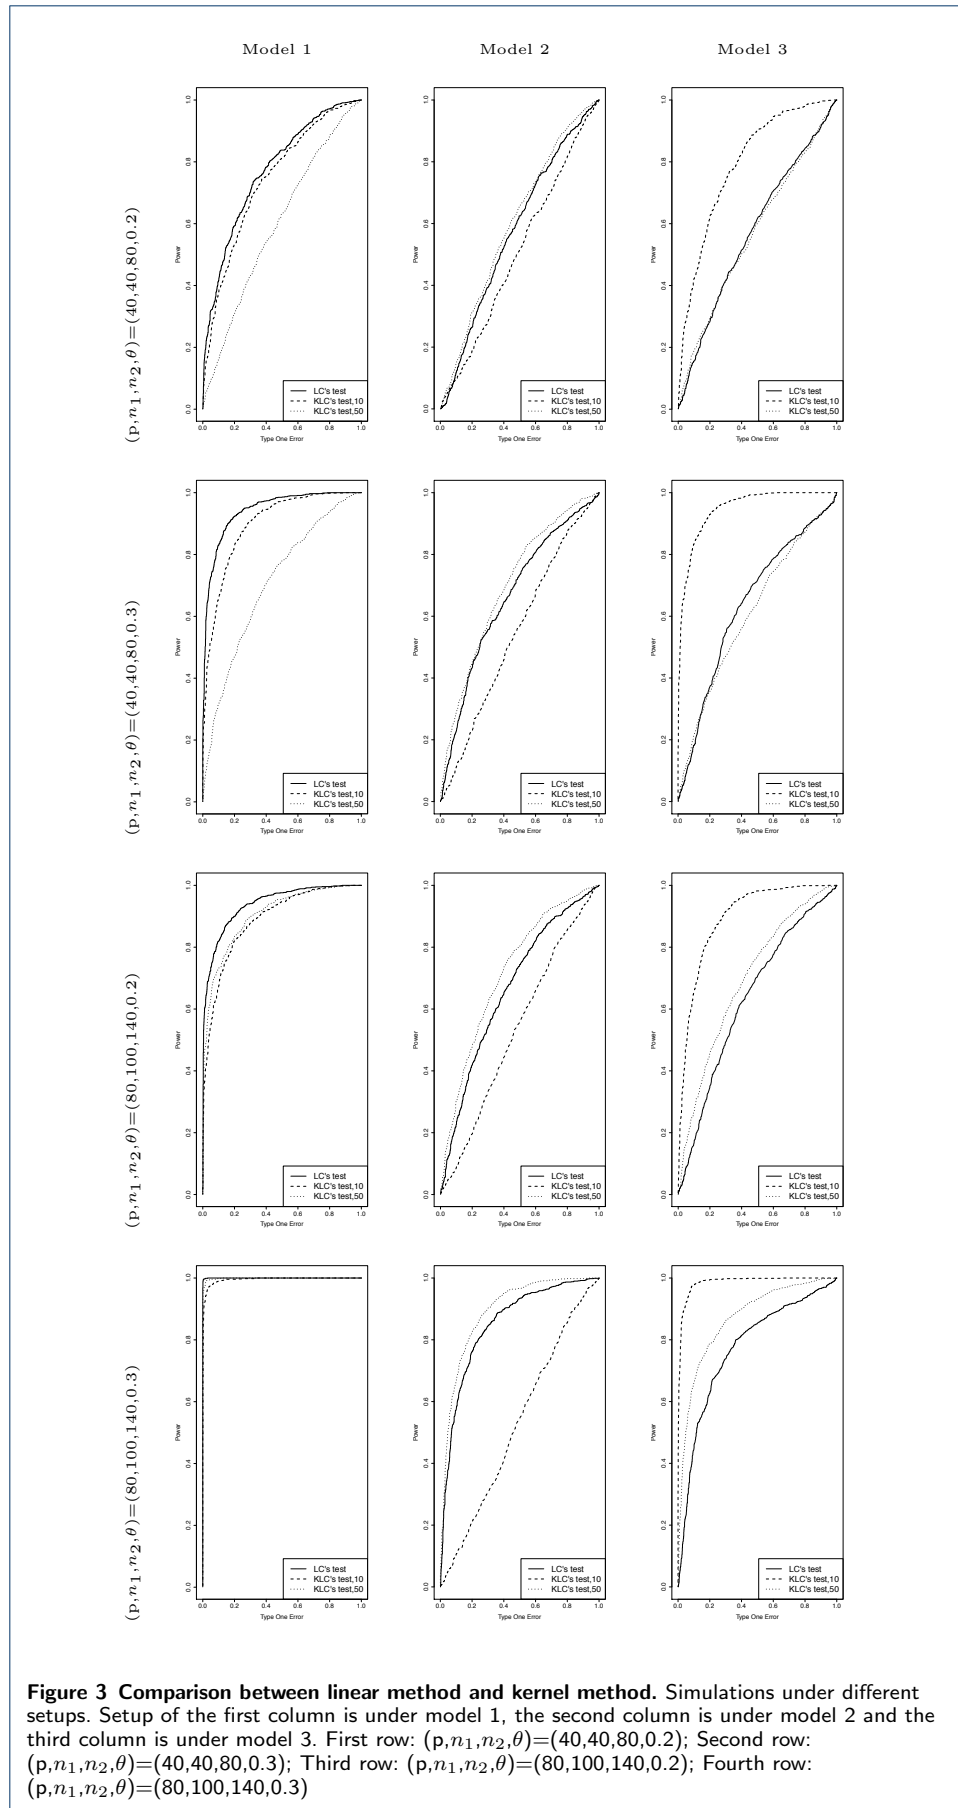

**Figure 3 Comparison between linear method and kernel method.** Simulations under different setups. Setup of the first column is under model 1, the second column is under model 2 and the third column is under model 3. First row:  $(p, n_1, n_2, \theta) = (40, 40, 80, 0.2)$ ; Second row:  $(p, n_1, n_2, \theta) = (40, 40, 80, 0.3)$ ; Third row:  $(p, n_1, n_2, \theta) = (80, 100, 140, 0.2)$ ; Fourth row:  $(p, n_1, n_2, \theta) = (80, 100, 140, 0.3)$
